# Supplementary material for: The Impact of Aging and Urbanization on CO2 Emission in Chinese Cities: An Empirical Analysis
Source: Research Square preprint supplement (doi:10.21203/rs.3.rs-6852089/v1), 2025-09-02
Supplement: Supplementary file 1 [file 641e6061db405b4dcded7959.docx]

# Supplementary material

**The Impact of Aging and Urbanization on CO2 Emission in Chinese Cities: An Empirical Analysis**

**Yongchun Zhao****[[1]](#footnote-1), Mengzhen Zhao****1,****[[2]](#footnote-2), Chi Zhang1,2**

**Contents**

**Table S1** Data sources from 2010 to 2020

**Table S2** Data sources in 2030-2060

**Table S3** Descriptive statistics for Key Variables

**Table S4** Test results for model endogeneity and instrumental variable test

**Table S5** Projected CO2 emissions in 2030 (Unit: MT)

**Table S6** Proportions of CO2 emissions associated with population aging and urbanization in total CO2 emissions (Unit: %)

# Table S1 Data sources from 2010 to 2020

| Data year | Variates | Data sources |
| --- | --- | --- |
| 2010-2020 | CO2 emissions | CEADs database 1-4 |
| Population | Provincial Statistical Yearbook |
| The elderly population | China City Statistic Yearbook5 |
| Urban population | China City Statistic Yearbook5 |
| Population aging | China City Statistic Yearbook5 |
| Average years of education per capita | China Population Census Yearbook 6 |
| Coal consumption in industrial enterprises above designated size | Provincial Statistical Yearbook |
| Energy consumption in industrial enterprises above designated size | Provincial Statistical Yearbook |
| Secondary Industry in GDP | Provincial Statistical Yearbook |
| Gross Domestic Product | Provincial Statistical Yearbook |
| Gender ratio | China City Statistic Yearbook5 |
| The share of the tertiary sector in GDP | Provincial Statistical Yearbook |
| Fiscal revenue | Provincial Statistical Yearbook |
| Per capita disposable income | Provincial Statistical Yearbook |
| Fixed-asset investment | Provincial Statistical Yearbook |

The dependent variable in this study is CO2 emissions. The endogenous explanatory variables include Population aging (*PAG*) and Urbanization (*URB*). The exogenous explanatory variables consist of GDP per capita (*PGDP*), average years of education per capita (*EDU*), energy structure (*STR*), and energy intensity (*INS*). The instrumental variables are gender ratio (*GEN*) and the share of tertiary sector in GDP (*TER*). Economic factors include both income and expenditure components. Income-related variables are represented by fiscal revenue (*REV*) and per capita disposable income (*PINC*), while expenditure-related factors are represented by *TER* and fixed-asset investment(*INV*).

*PAG* is calculated as the proportion of elderly individuals within the total population. *URB* is calculated as the proportion of the permanent urban population within the total population. *TER* is calculated as the proportion of the value-added of tertiary sectors within GDP. *STR* is calculated as the proportion of coal consumption by enterprises in total energy consumption. *INS* is calculated as the proportion of energy consumption in the value-added in secondary industry. This study utilizes data from industrial enterprises above designated size (IEDS) to calculate energy structure and energy intensity, as these enterprises typically consume more energy than others and maintain more comprehensive records. *GEN* represents the number of males per 100 females.

# Table S2 Data sources in 2030-2060

| Data year | Variates | Data sources |
| --- | --- | --- |
| 2030-2100 | *PAG* | Chen et al. (2020)7 |
| *URB* | Chen et al. (2020)7 |
| *PGDP* | Jiang et al. (2022)8 |
| *EDU* | Chen et al. (2020)7 |
| *STR* | Provincial Statistical Yearbook and Bauer et al. (2017)9 |
| *INS* | Bauer et al. (2017)9 and Huang et al. (2023)10 |

The predictive data for *PAG*, *URB*, and *EDU* are sourced from Chen et al. (2020)7, *PGDP* are obtained from Jiang et al. (2022)8. The predictive data for *STR* are sourced from Huang et al. (2023)10, which provides projections of the consumption proportions for natural gas, oil, coal, thermal energy, and electricity in China. Based on this, we extract coal energy consumption data, refine it to the city level, and ultimately project the urban coal energy structure in China under the SSP scenario during 2030-2060.

Existing studies do not provide projected results for *INS*. To obtain accurate data, this study first calculates the average growth rate of China’s energy consumption from 2011 to 2020 based on data from the Provincial Statistical Yearbook, yielding a rate of 3.3%. Based on the characterization of energy consumption patterns under the SSP1-SSP5 scenarios by Bauer et al (2017)9, we then estimate China’s energy consumption growth rate for the period from 2030 to 2060. According to Bauer et al (2017)9, under the SSP1 scenario, energy demand shifts rapidly toward non-fossil fuels. In contrast, the SSP2 scenario follows a long-term trajectory similar to historical growth trends. While the overall energy demand in SSP3 is comparable to that of SSP2, social and economic development in SSP3 primarily relies more heavily on fossil fuels, leading to higher coal consumption than in SSP2. Energy demand under SSP4 exceeds that of SSP3. Despite regional economic disparities in SSP3, the accelerated adoption of renewable energy and clean technologies in developed countries reduces overall reliance on fossil fuels compared to SSP4. SSP5 exhibits the highest energy demand among the scenarios, driven by rapid economic development and a corresponding surge in fossil fuel consumption, particularly coal. Accordingly, this study sets China’s projected energy consumption growth rates for 2030-2060 under the SSP1 to SSP5 scenarios at 3.1%, 3.3%, 3.3%, 4.0%, and 4.3%, respectively.

Based on projected energy consumption and the forecasted value-added of the secondary sector from Jiang et al. (2022)8, this study estimates the *INS* for 2030-2060 under the SSP1 to SSP5 scenarios as 9.16-10.97, 9.77-11.47, 10.72-11.49, 9.39-10.48, 6.94-10.56, respectively.

# Table S3 Descriptive statistics for key variables

| Variates | Abbreviation | Unit | Average | Standard deviation | Median | Maximum | Minimum |
| --- | --- | --- | --- | --- | --- | --- | --- |
| CO2 emissions | *CO*2 | million tons | 42.948 | 47.592 | 28.980 | 537.476 | 1.342 |
| Population aging rate | *PAG* | Percentage | 11.511 | 4.363 | 10.975 | 61.273 | 1.530 |
| Urbanization | *URB* | Percentage | 54.591 | 17.627 | 53.146 | 199.771 | 7.373 |
| GDP per capita | *PGDP* | 100 thousand per capita | 9.239 | 6.599 | 7.567 | 38.243 | 0.449 |
| Average years of education per capita | *EDU* | Year | 9.046 | 0.844 | 8.910 | 12.810 | 6.602 |
| Energy structure | *STR* | / | 64.728 | 24.667 | 69.718 | 100.000 | 0.428 |
| Energy instance | *INS* | Tons of standard coal per thousand yuan | 20.182 | 23.789 | 12.398 | 293.161 | 0.346 |
| Gender ratio | *GEN* | / | 104.917 | 4.166 | 104.658 | 130.059 | 63.315 |
| The share of tertiary sector in GDP | *TER* | Percentage | 43.394 | 12.632 | 41.894 | 91.640 | 8.135 |
| Fiscal revenue | *REV* | Hundred million yuan | 27.734 | 59.912 | 12.075 | 716.510 | 0.643 |
| Per capita disposable income | *PINC* | Thousand yuan per capita | 28.900 | 10.043 | 27.385 | 76.437 | 10.790 |
| Fixed-asset investment | *INV* | Billion yuan | 357.489 | 424.212 | 225.106 | 5306.680 | 4.737 |

Excluding cities with unavailable energy structure and energy instance, this study choses 200 Chinese cities for analysis. To eliminate the impact of inflation, the values in this study are adjusted to constant 2010 prices. Table S3 shows that the average annual CO2 emissions of Chinese cities are 42.95 Mt, with a standard deviation of 47.59. This reflects considerable variation in emissions across cities, which is second only to the variation in fiscal revenue. The average *PAG* is 11.51 percent, with a standard deviation of 4.36, both of which are lower than the average *URB* of 54.59 percent and its standard deviation of 17.63. These figures indicate that urbanization surpasses aging both in absolute level and in variation across cities.

# Table S4 Test results for model endogeneity and instrumental variables test

| Validity test | Exogenous hypothesis | | Endogenous hypothesis |
| --- | --- | --- | --- |
| (1)  RE | (2)  FE | (3)  2SLS |
| Hausman test |  | 49.69  [0.000] |  |
| Hausman test |  |  | 386.03  [0.000] |
| Mean VIF | 1.64 |  |  |
| Kleibergen-Paap rk LM statistic |  |  | 47.230  [0.000] |
| Cragg-Donald Wald F statistic |  |  | 23.847 |
| Kleibergen-Paap rk Wald F statistic |  |  | 25.845 |
| Stock-Yogo weak ID test critical values (10%) |  |  | 7.03 |

Notes: The values in square brackets represent p-values.

Table S4 examines multicollinearity (Column 1), selects between fixed and random effects (Column 2), assesses variable endogeneity, and tests the validity of the instrumental variables (Column 3).

Column 1 reports that the average variance inflation factor (VIF) for the explanatory variables is 1.64, indicating an acceptable level of multicollinearity in the model. Assuming that *PAG* and *URB* are exogenous variables in the model, Column 2 presents the results of the Hausman test comparing the linear random effects and fixed effects models. The test yields χ2(6) = 49.69, with a p-value that significantly rejects the null hypothesis that no difference in coefficients between the random and fixed effects models. This suggests that the fixed effects model accounts for omitted variables that capture time-invariant individual differences. Compared to the random effects model, the fixed effects model provides more efficient coefficient estimates. Column 3 shows the Hausman test results comparing the fixed effects and two-stage least squares (2SLS) estimators, yielding χ2(6) = 386.03. The p-value significantly rejects the null hypothesis that no difference in coefficients between the fixed effects and 2SLS models. This indicates that *PAG* and *URB* exhibit endogeneity in the model, and it is necessary to use instrumental variables for coefficient estimation.

In this study, both *PAG* and *URB* have a single instrumental variable, ensuring exact identification and thus an overidentification test is not required. The Kleibergen-Paap rk LM statistic in Column 3 is used for the under-identification test, with a p-value of less than 0.01. The test results reject the null hypothesis at the 1% significance level, indicating that the instrumental variables provide sufficient identifying information for the endogenous variables. The Cragg-Donald Wald F-statistic is 23.847, and the Kleibergen-Paap rk Wald F-statistic is 25.845, both of which exceed the 10% critical value proposed by Stock and Yogo (2005)11, confirming that the instrumental variables are not weakly correlated with the endogenous explanatory variables12. Therefore, the instrumental variables in this study satisfy the relevance condition and are valid.

# Table S5 Projected CO2 emissions in 2030 (Unit: MT)

| Scenarios/Year | SSP1 | SSP2 | SSP3 | SSP4 | SSP5 |
| --- | --- | --- | --- | --- | --- |
| Total CO2 emissions | 17894.86 | 17966.57 | 15111.87 | 17460.21 | 19395.44 |
| CO2 emissions related to population aging and urbanization | 5371.22 | 5519.25 | 4663.29 | 5276.61 | 5807.18 |

Table S5 presents the projected total CO2 emissions and CO2 emissions related to population aging and urbanization under SSP1-SSP5 scenarios in 2030. These projections are based on the regression coefficients estimated using the 2SRI method within the STIRPAT model, as described in the main text. The related emissions are calculated by subtracting the CO2 emissions estimated under the assumption that population aging and urbanization remain at their 2020 levels (with all other variables set to their 2030 projections) from the emissions estimated using 2030 projections for all variables.

# Table S6 Proportions of CO2 emissions associated with population aging and urbanization in total CO2 emissions (Unit: %)

| Scenarios/Year | | 2030 | 2040 | 2050 | 2060 |
| --- | --- | --- | --- | --- | --- |
| SSP1 | Proportions of population aging related CO2 emissions | 39.72 | 58.62 | 64.02 | 70.29 |
| Proportions of urbanization related CO2 emissions | -9.70 | -17.13 | -21.51 | -24.10 |
| Proportions of both factors related CO2 emissions | 30.02 | 41.48 | 42.52 | 46.19 |
| SSP2 | Proportions of population aging related CO2 emissions | 37.98 | 56.32 | 60.57 | 66.03 |
| Proportions of urbanization related CO2 emissions | -7.26 | -13.42 | -16.75 | -18.65 |
| Proportions of both factors related CO2 emissions | 30.72 | 42.90 | 43.81 | 47.38 |
| SSP3 | Proportions of population aging related CO2 emissions | 35.84 | 53.61 | 56.74 | 61.41 |
| Proportions of urbanization related CO2 emissions | -4.98 | -9.65 | -11.93 | -13.09 |
| Proportions of both factors related CO2 emissions | 30.86 | 43.96 | 44.80 | 48.32 |
| SSP4 | Proportions of population aging related CO2 emissions | 39.17 | 57.96 | 63.43 | 69.84 |
| Proportions of urbanization related CO2 emissions | -8.95 | -15.95 | -19.95 | -22.48 |
| Proportions of both factors related CO2 emissions | 30.22 | 42.00 | 43.48 | 47.36 |
| SSP5 | Proportions of population aging related CO2 emissions | 39.67 | 58.39 | 63.64 | 69.89 |
| Proportions of urbanization related CO2 emissions | -9.73 | -17.29 | -21.74 | -24.46 |
| Proportions of both factors related CO2 emissions | 29.94 | 41.10 | 41.90 | 45.43 |

Table S6 presents the detailed numerical values underlying the bar chart in Fig. 1, offering quantitative support for the graphical representation of the results. In the main text, Fig. 1 presents population aging impact represented by the proportions of CO2 emissions related to aging, and the urbanization impact represented by the proportions of CO2 emissions related to urbanization. The combined effects of population aging and urbanization are shown as the proportions of CO2 emissions related to both factors, that is, the sum of the two individual proportions.

# References

1. Shan, Y. et al. City-Level Climate Change Mitigation in China. *Science advances* **4**, eaaq0390 (2018).

2. Shan, Y. et al. Methodology and Applications of City-Level CO₂ Emission Accounts in China. *Journal of Cleaner Production* **161**, 1215-1225 (2017).

3. Shan, Y. et al. City-Level Emission Peak and Drivers in China. *Science Bulletin* **67**, 1910-1920 (2022).

4. Shan, Y. et al. An Emissions-Socioeconomic Inventory of Chinese Cities. *Scientific data* **6**, 1-10 (2019).

5. National Bureau of Statistics of China. China City Statistical Yearbook (In Chinese) (China Statistics Press, 2023).

6. National Bureau of Statistics of China. China Population Census Yearbook 2020 (In Chinese) (China Statistics Press, 2023).

7. Chen, Y. et al. Provincial and Gridded Population Projection for China Under Shared Socioeconomic Pathways from 2010 to 2100 Data sets. *Scientific Data* <https://doi.org/10.6084/m9.figshare.c.4605713.v1> (2020).

8. Jiang, T. et al. Gridded Datasets for Population and Economy Under Shared Socioeconomic Pathways for 2020–2100 (In Chinese) Data sets. *Science Data Bank* <https://doi.org/10.57760/sciencedb.01683> (2022).

9. Bauer, N. et al. Shared Socio-Economic Pathways of the Energy Sector-Quantifying the Narratives. *Global Environmental Change-Human and Policy Dimensions* **42**, 316-330 (2017).

10. Huang, Y. et al. Can China Achieve Its 2030 and 2060 CO₂ Commitments? Scenario Analysis Based on the Integration of LEAP Model with LMDI Decomposition. *Science of the Total Environment* **888**, 164151 (2023).

11. Stock, J. H. & Yogo, M. Chapter 6: Asymptotic Distributions of Instrumental Variables Statistics with Many Instruments. *Identification and inference for econometric models: Essays in honor of Thomas Rothenberg* **6**, 109-120 (2005).

12. Douglas, S. & Stock James, H. Instrumental Variables Regression with Weak Instruments. *Econometrica* **65**, 557-586 (1997).

1. School of Management, Beijing Institute of Technology, Beijing, China [↑](#footnote-ref-1)
2. School of Global Governance, Beijing Institute of Technology, Beijing, China [↑](#footnote-ref-2)
